# Supplementary material for: Clinical outcomes of pelvic bone marrow sparing radiotherapy for cervical cancer: A systematic review and meta-analysis of randomised controlled trials
Source: PubMed Central journal article supplement — Clin Transl Radiat Oncol. 2024 May 31;47:100801. doi: 10.1016/j.ctro.2024.100801 (PMC11214291; doi:10.1016/j.ctro.2024.100801), 2024-05-31

## Analyses of haematologic toxicity subtypes: leukopenia

### Incidence of G $\geq 2$ leukopenia

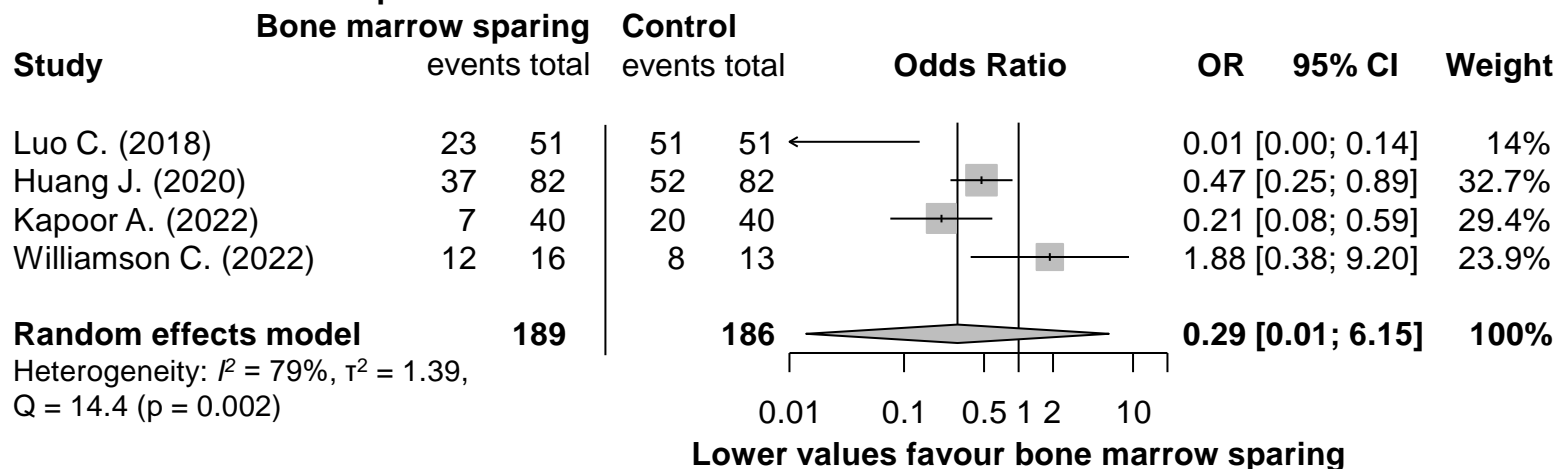

### Incidence of G $\geq 3$ leukopenia

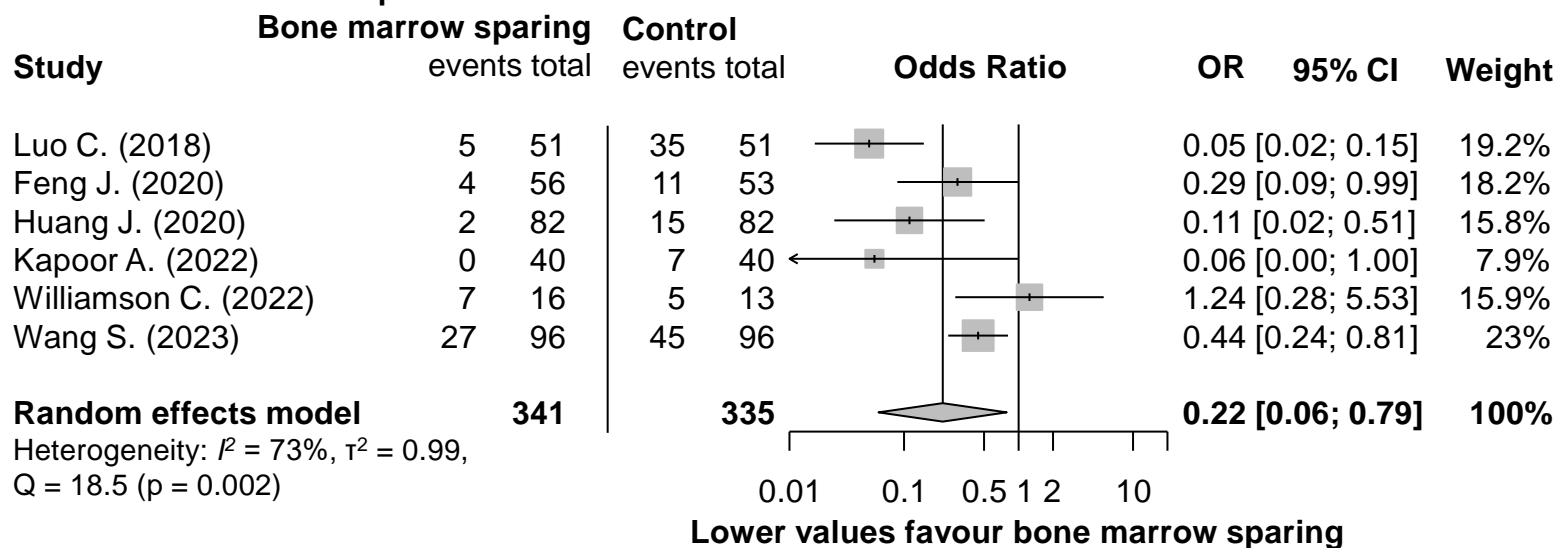

## Analyses of haematologic toxicity subtypes: **neutropenia**

### Incidence of G $\geq 2$ neutropenia

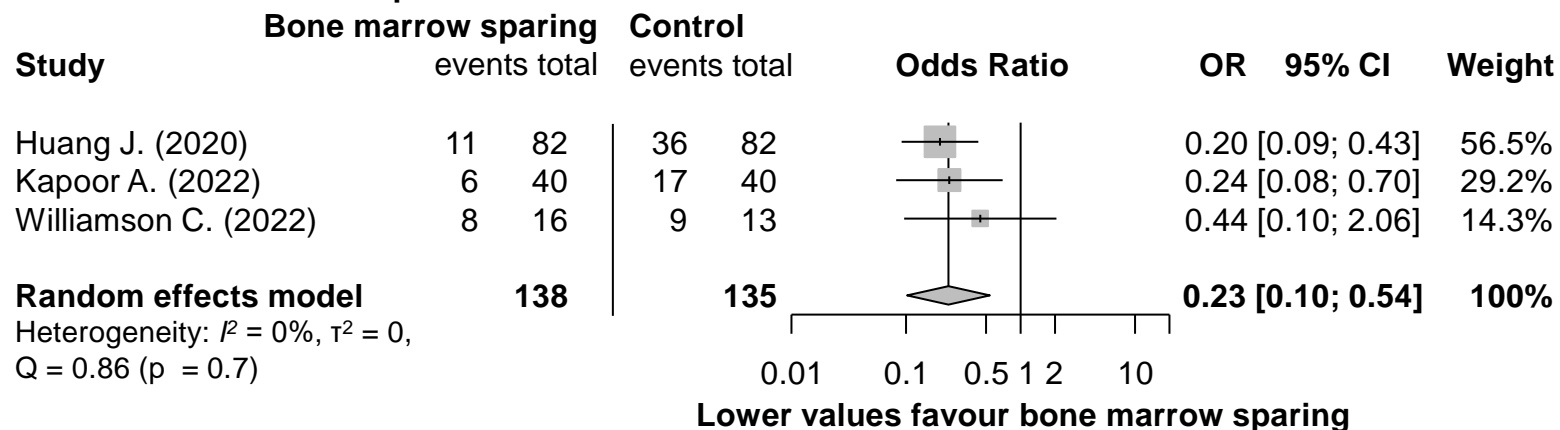

### Incidence of G $\geq 3$ neutropenia

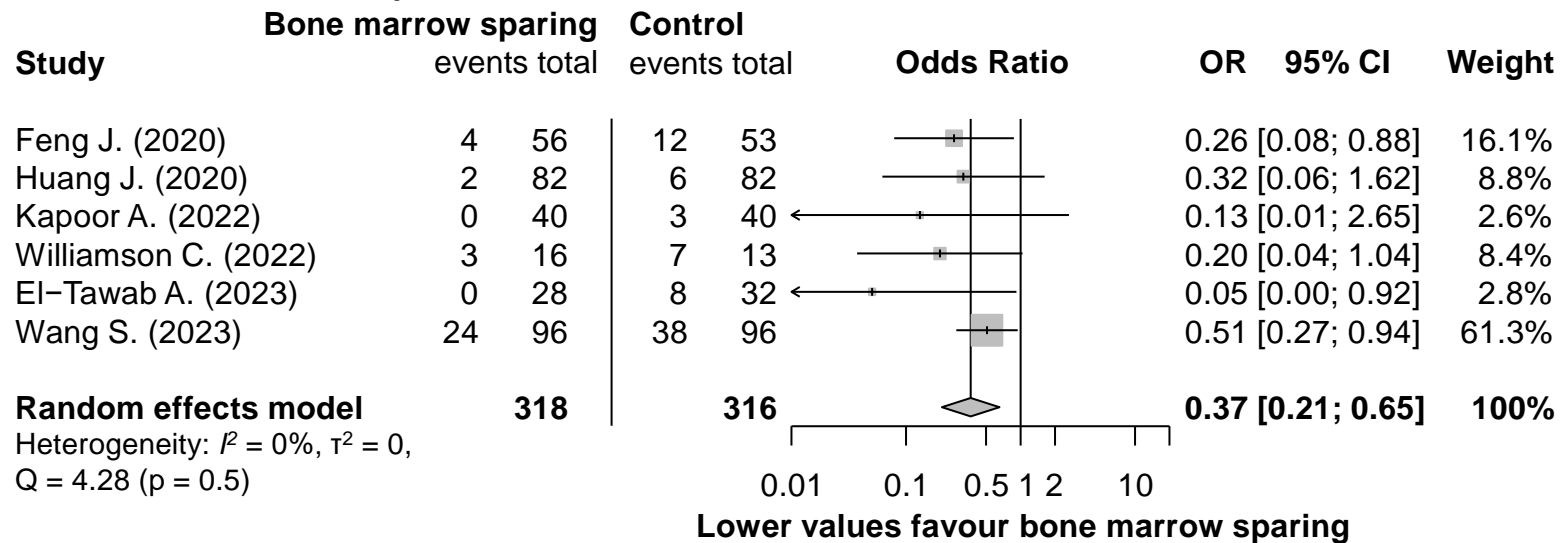

# Analyses of haematologic toxicity subtypes: lymphopenia

## Incidence of G $\geq 2$ lymphopenia

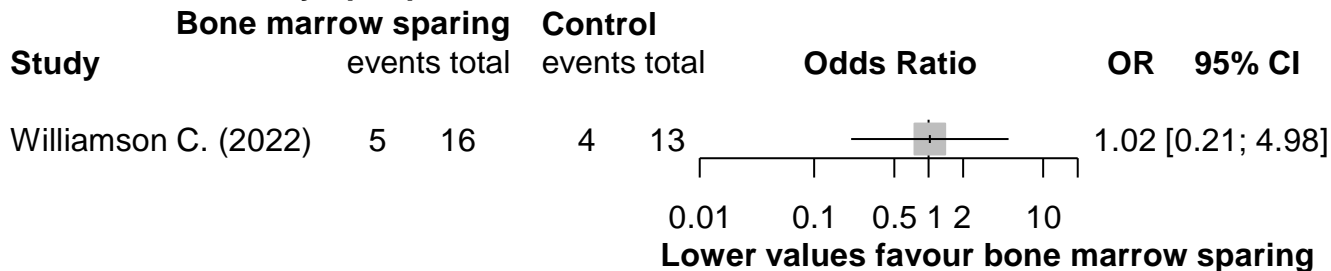

## Incidence of G $\geq 3$ lymphopenia

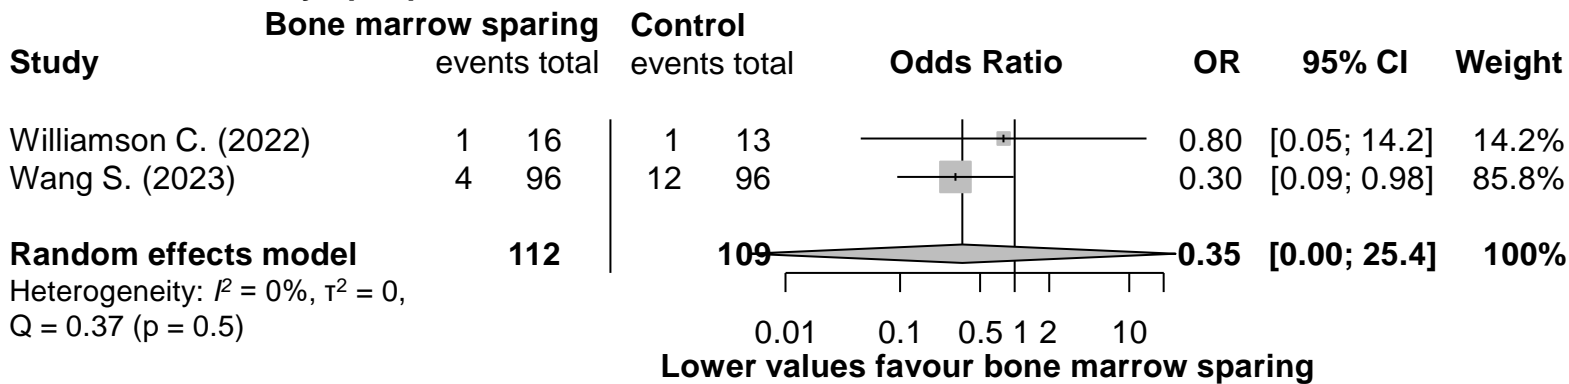

## Analyses of haematologic toxicity subtypes: anemia

### Incidence of G $\geq 2$ anemia

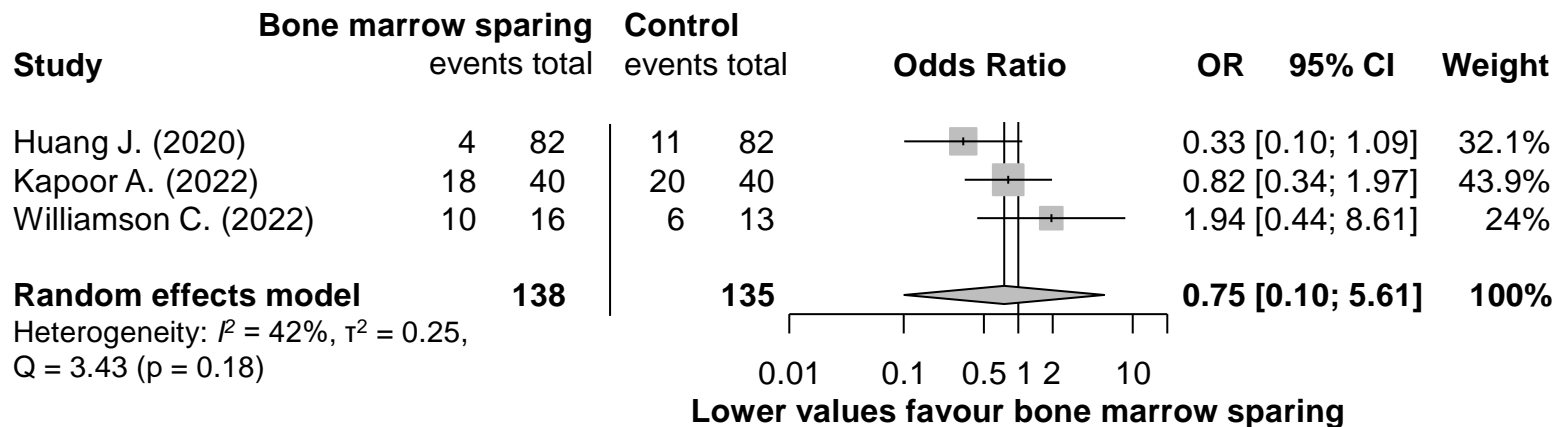

### Incidence of G $\geq 3$ anemia

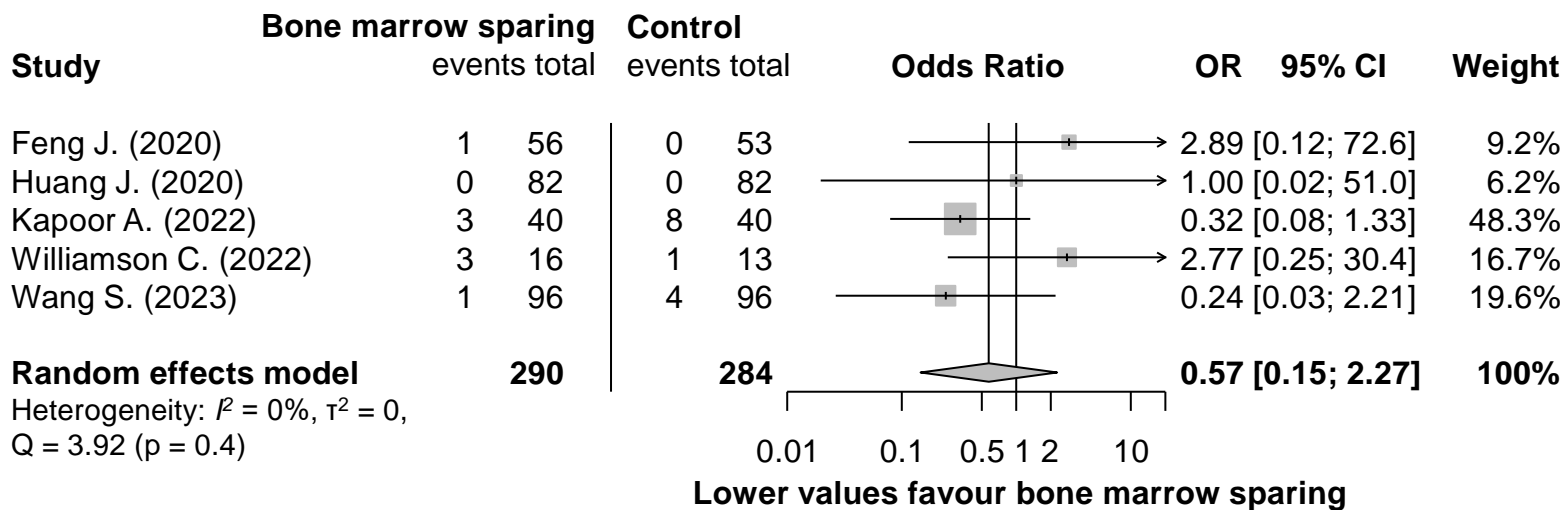

## Analyses of haematologic toxicity subtypes: thrombocytopenia

### Incidence of G $\geq 2$ anemia

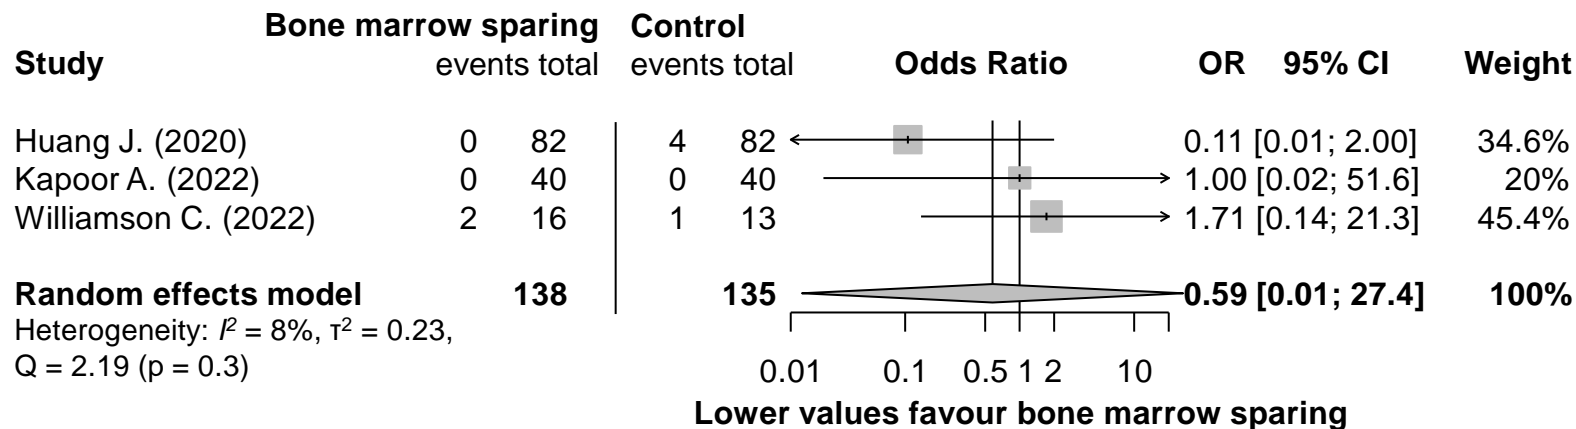

### Incidence of G $\geq 3$ anemia

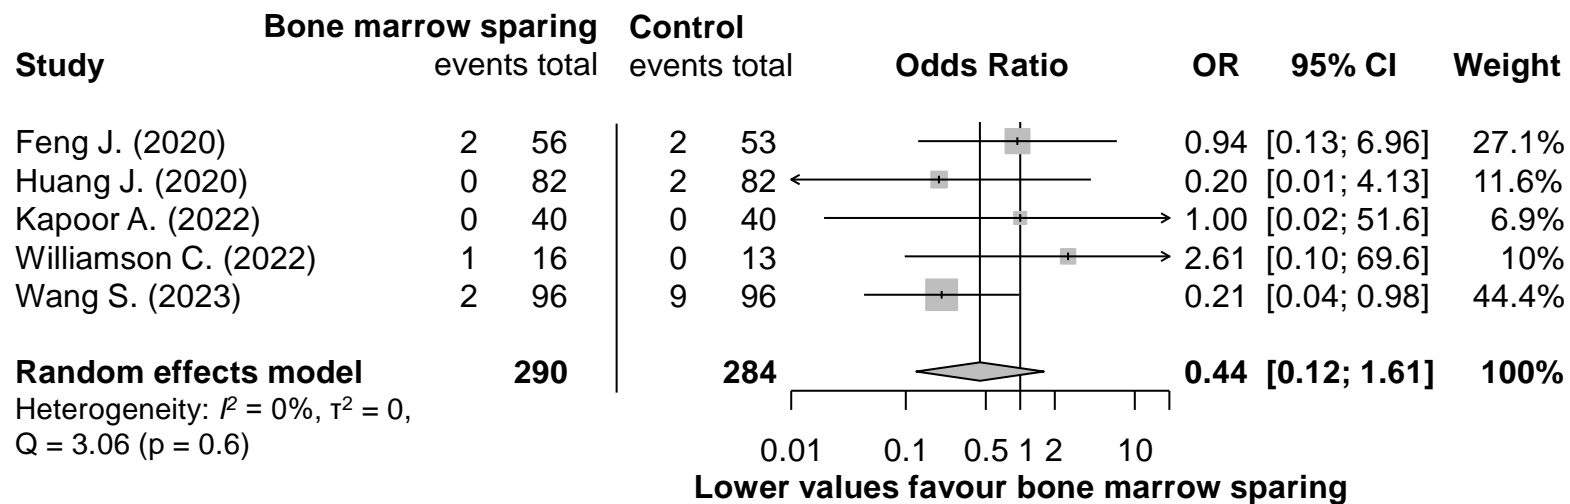

Supplement: mmc8.pdf [file mmc8.pdf]
