# Supplementary material for: Clinical outcomes of pelvic bone marrow sparing radiotherapy for cervical cancer: A systematic review and meta-analysis of randomised controlled trials
Source: PubMed Central journal article supplement — Clin Transl Radiat Oncol. 2024 May 31;47:100801. doi: 10.1016/j.ctro.2024.100801 (PMC11214291; doi:10.1016/j.ctro.2024.100801), 2024-05-31

### Incidence of G $\geq$ 3 gastrointestinal toxicity

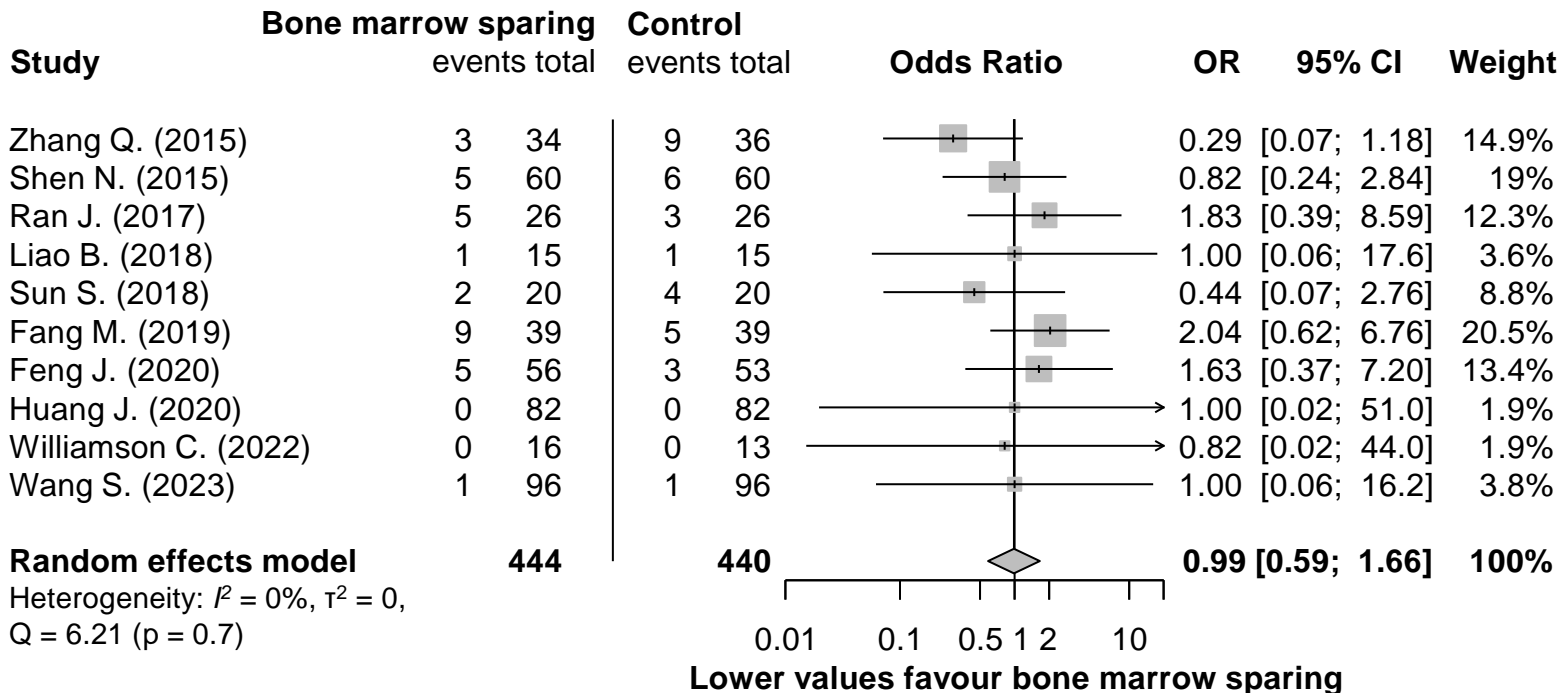

Heterogeneity:  $I^2 = 0\%$ ,  $\tau^2 = 0$ ,  
 $Q = 6.21$  ( $p = 0.7$ )

## Incidence of G $\geq 2$ gastrointestinal toxicity

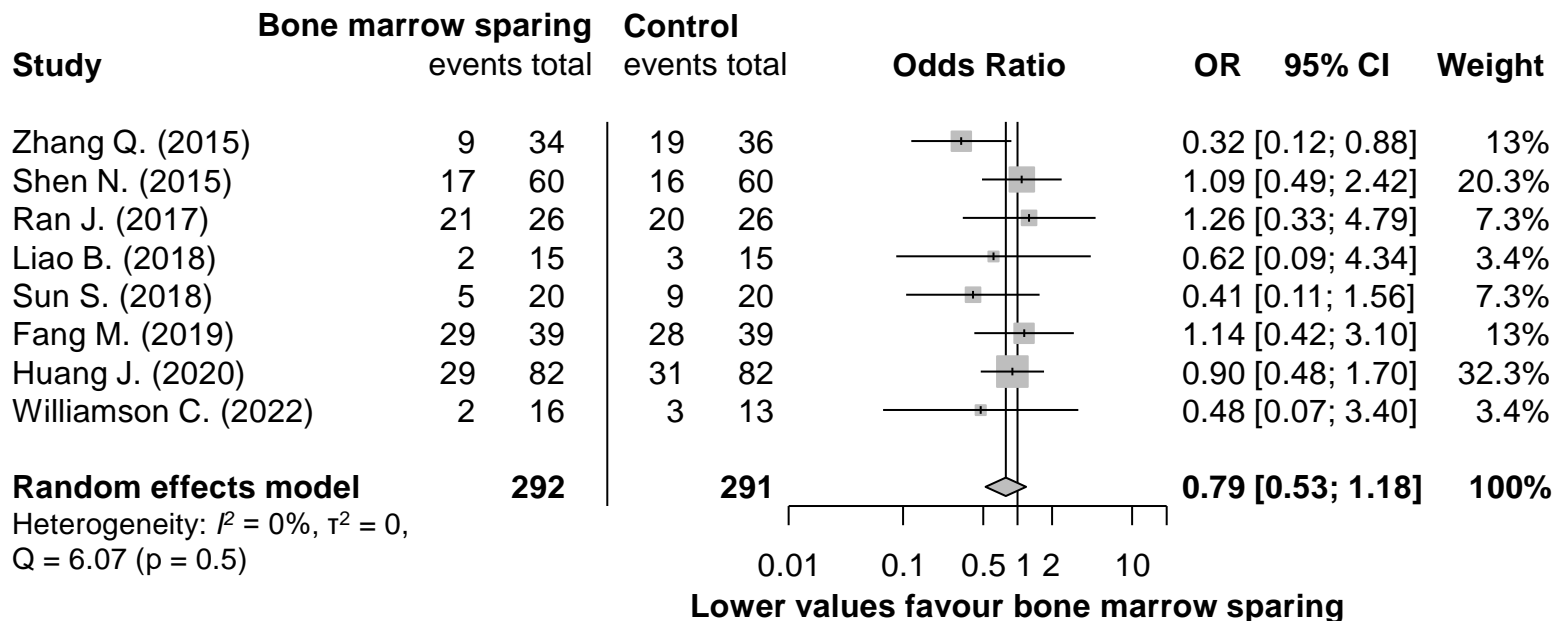

## Incidence of G $\geq$ 3 genitourinary toxicity

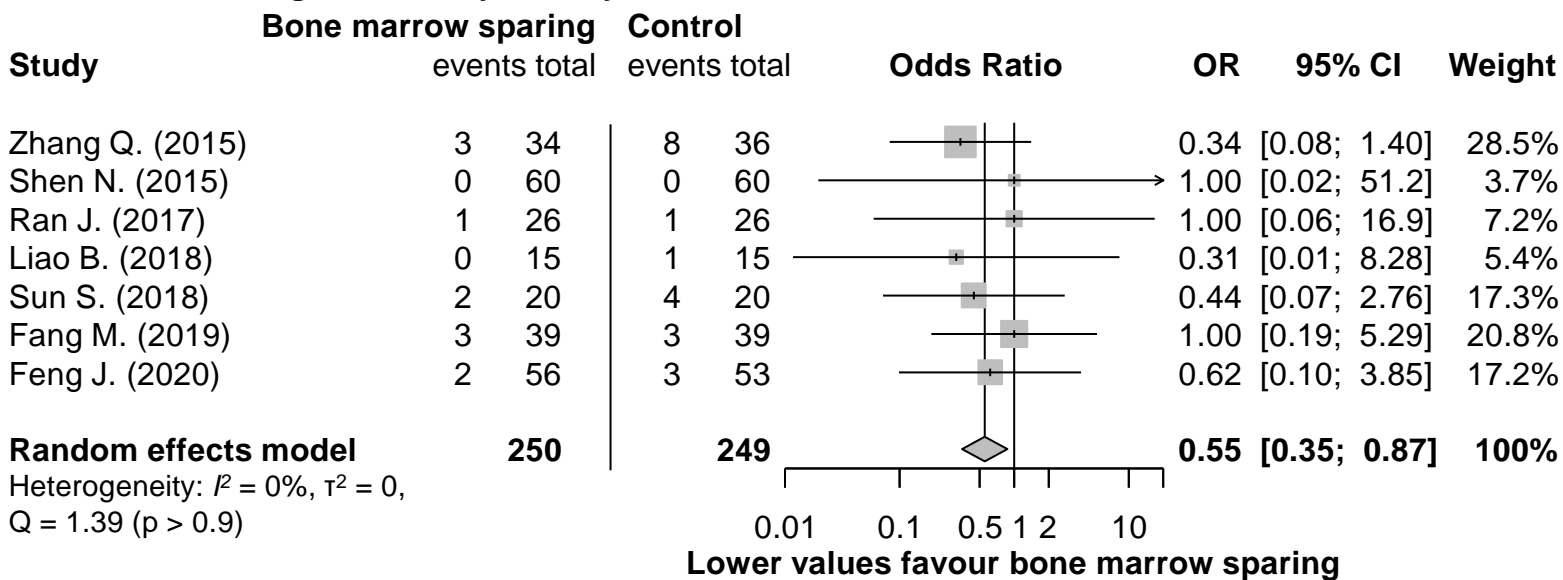

## Incidence of G $\geq 2$ genitourinary toxicity

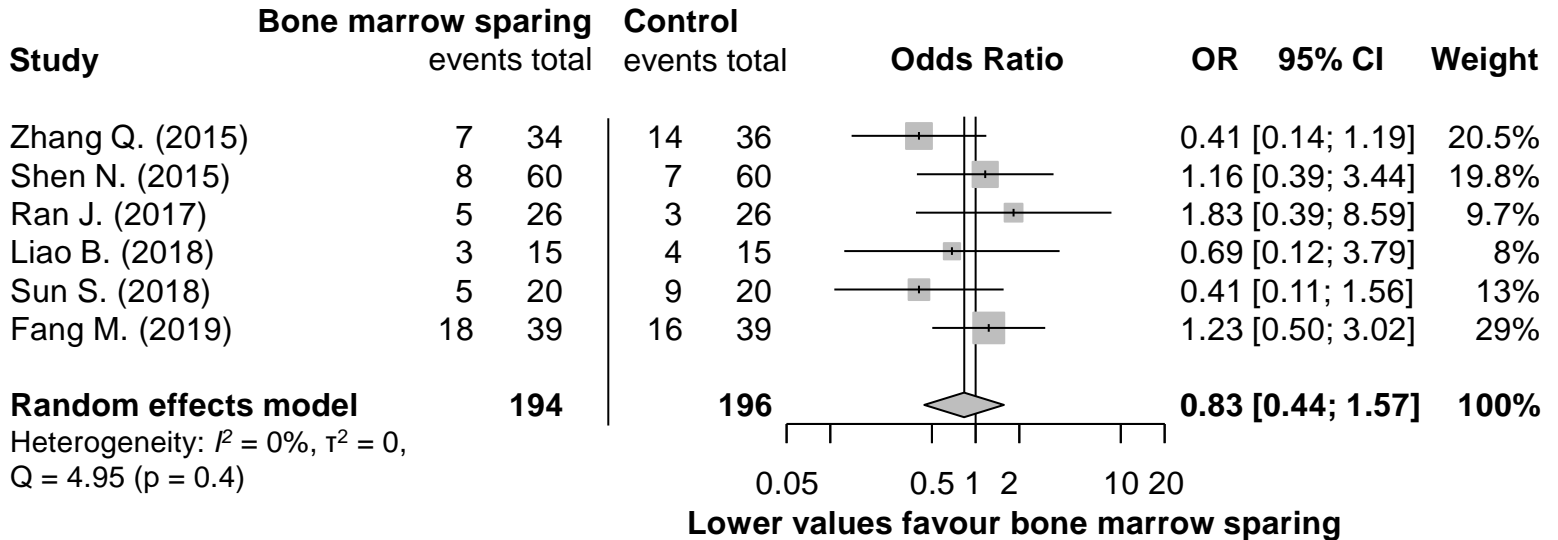

Supplement: mmc9.pdf [file mmc9.pdf]
