# Supplementary material for: Clinical outcomes of pelvic bone marrow sparing radiotherapy for cervical cancer: A systematic review and meta-analysis of randomised controlled trials
Source: PubMed Central journal article supplement — Clin Transl Radiat Oncol. 2024 May 31;47:100801. doi: 10.1016/j.ctro.2024.100801 (PMC11214291; doi:10.1016/j.ctro.2024.100801), 2024-05-31

### Incidence of chemotherapy interruption (excluding studies with high risk of bias)

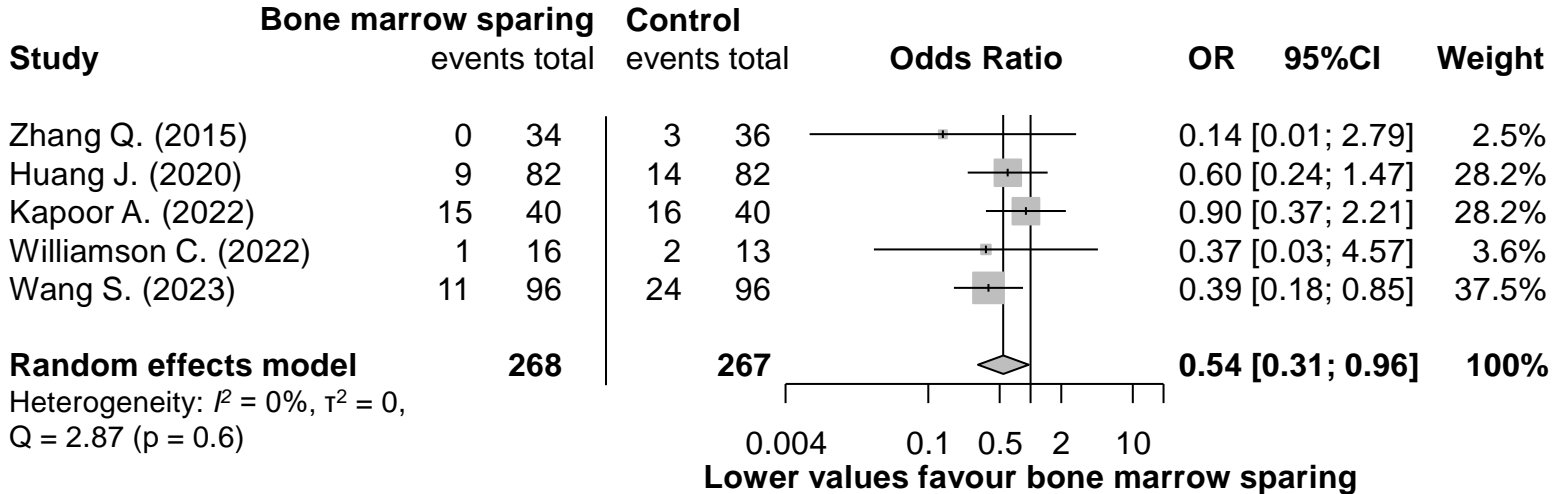

## Incidence of G $\geq 3$ haematologic toxicity (excluding studies with high risk of bias)

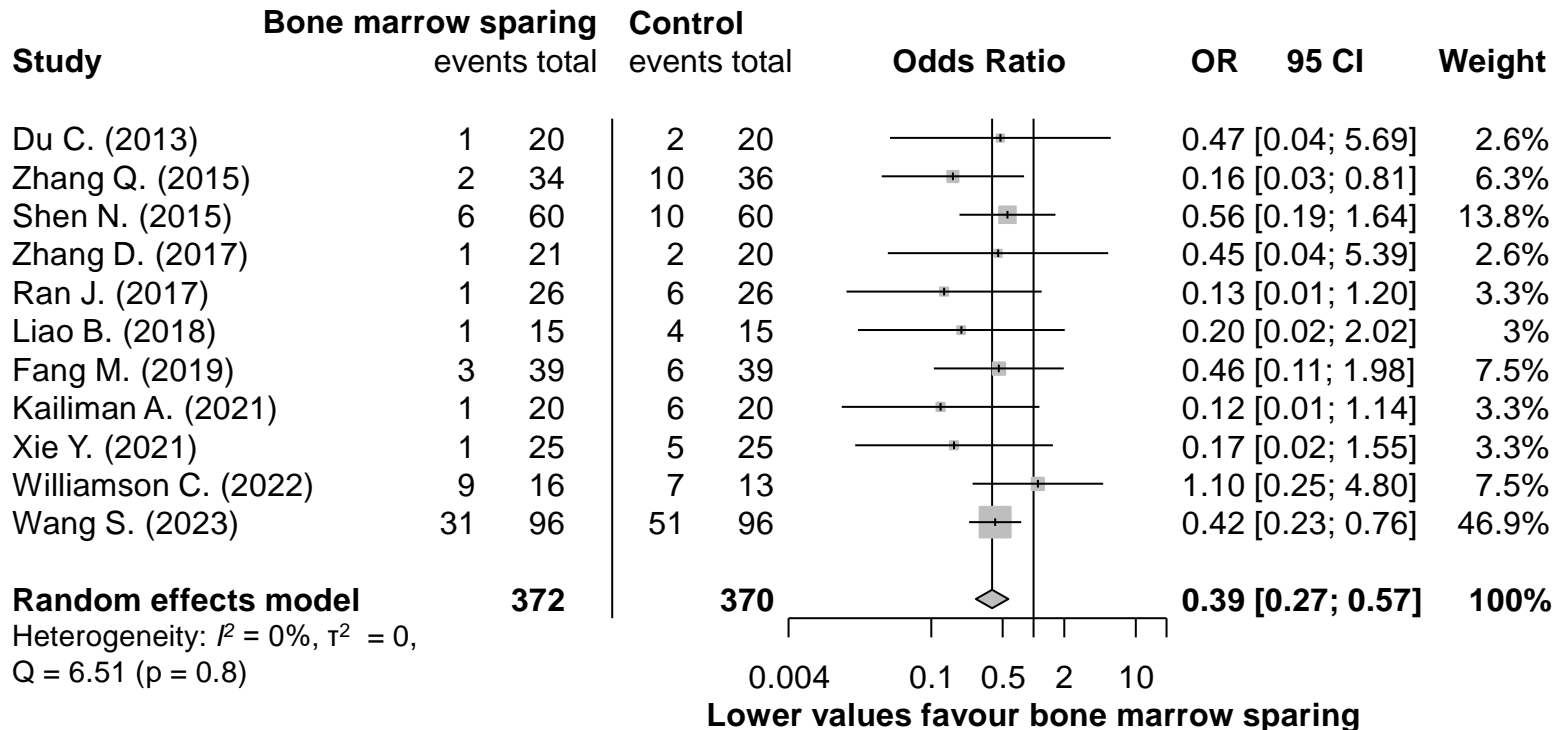

### Incidence of G $\geq$ 3 haematologic toxicity (only studies using RTOG toxicity scale)

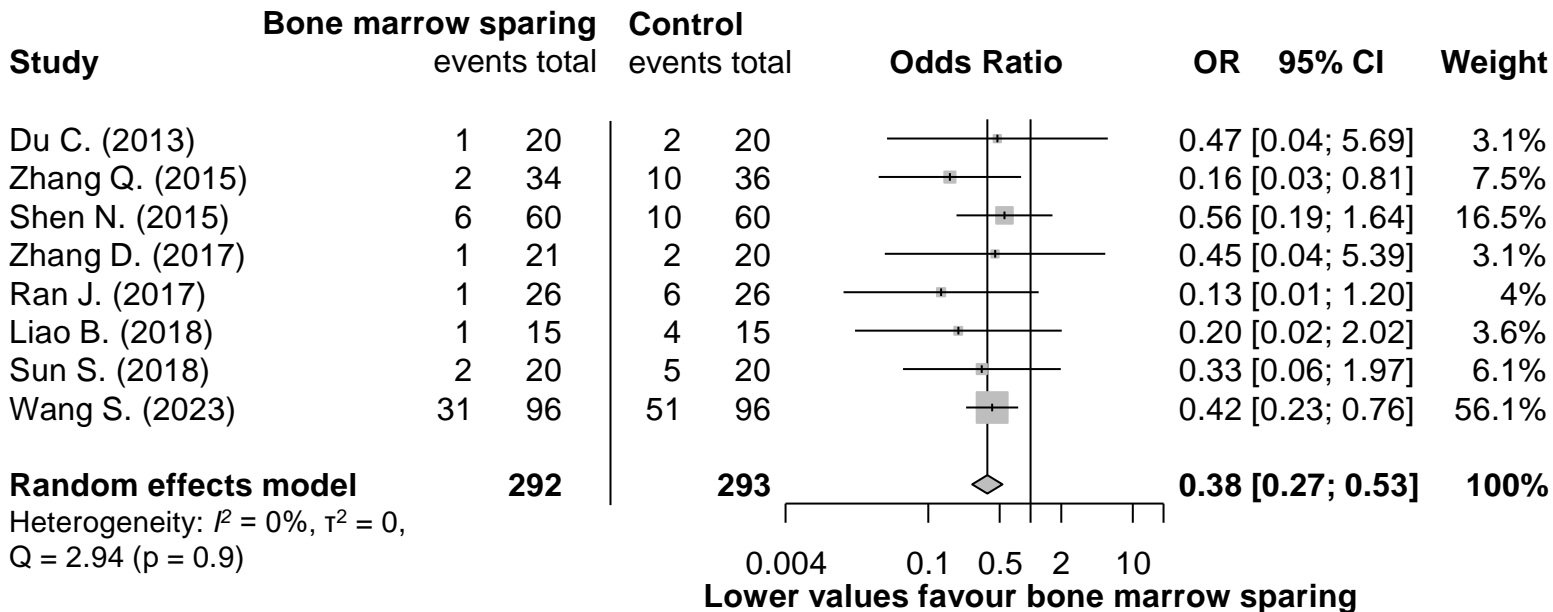

## Incidence of G $\geq$ 3 haematologic toxicity (excluding the study by Wang et al.)

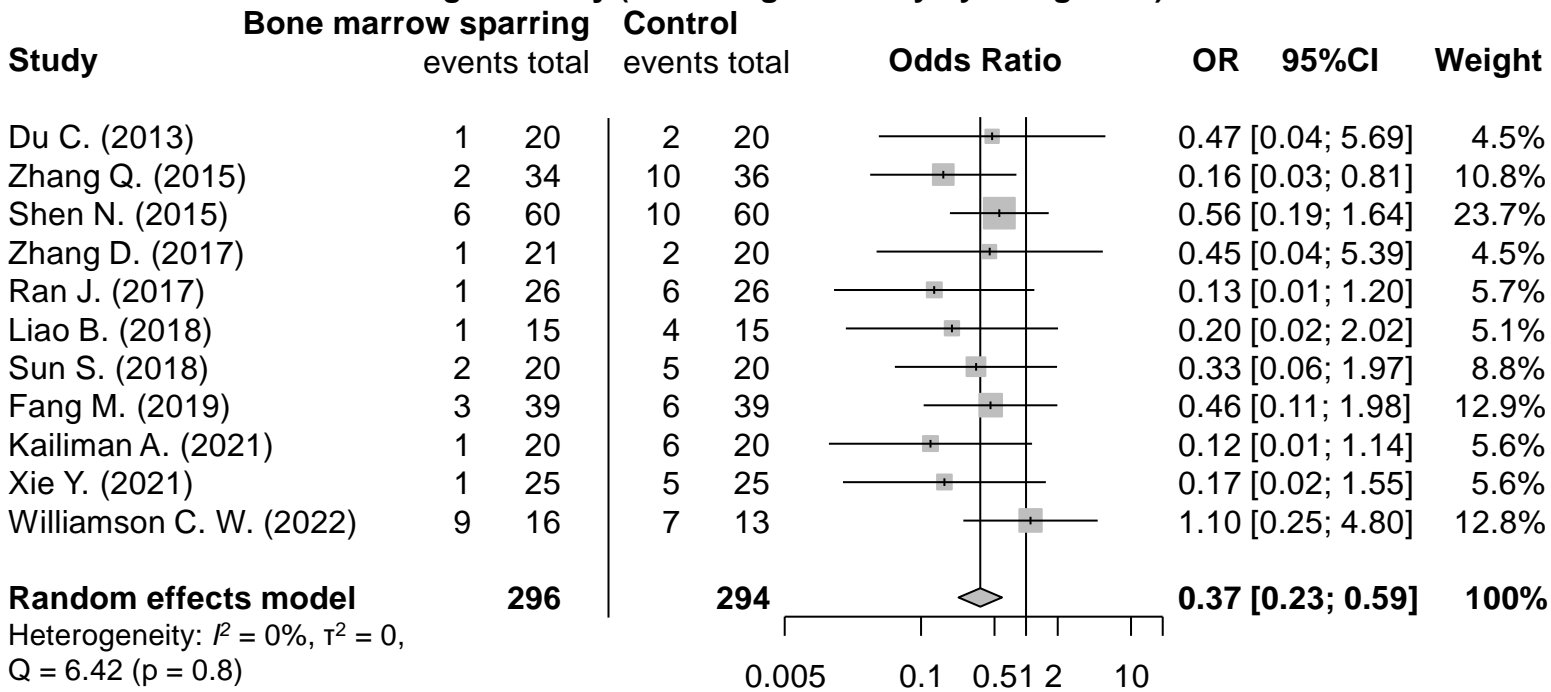

Supplement: mmc10.pdf [file mmc10.pdf]
