# Supplementary material for: Clinical outcomes of pelvic bone marrow sparing radiotherapy for cervical cancer: A systematic review and meta-analysis of randomised controlled trials
Source: PubMed Central journal article supplement — Clin Transl Radiat Oncol. 2024 May 31;47:100801. doi: 10.1016/j.ctro.2024.100801 (PMC11214291; doi:10.1016/j.ctro.2024.100801), 2024-05-31

Funnel plot for Figure 2 - Incidence of G  $\geq$ 3 haematologic toxicity

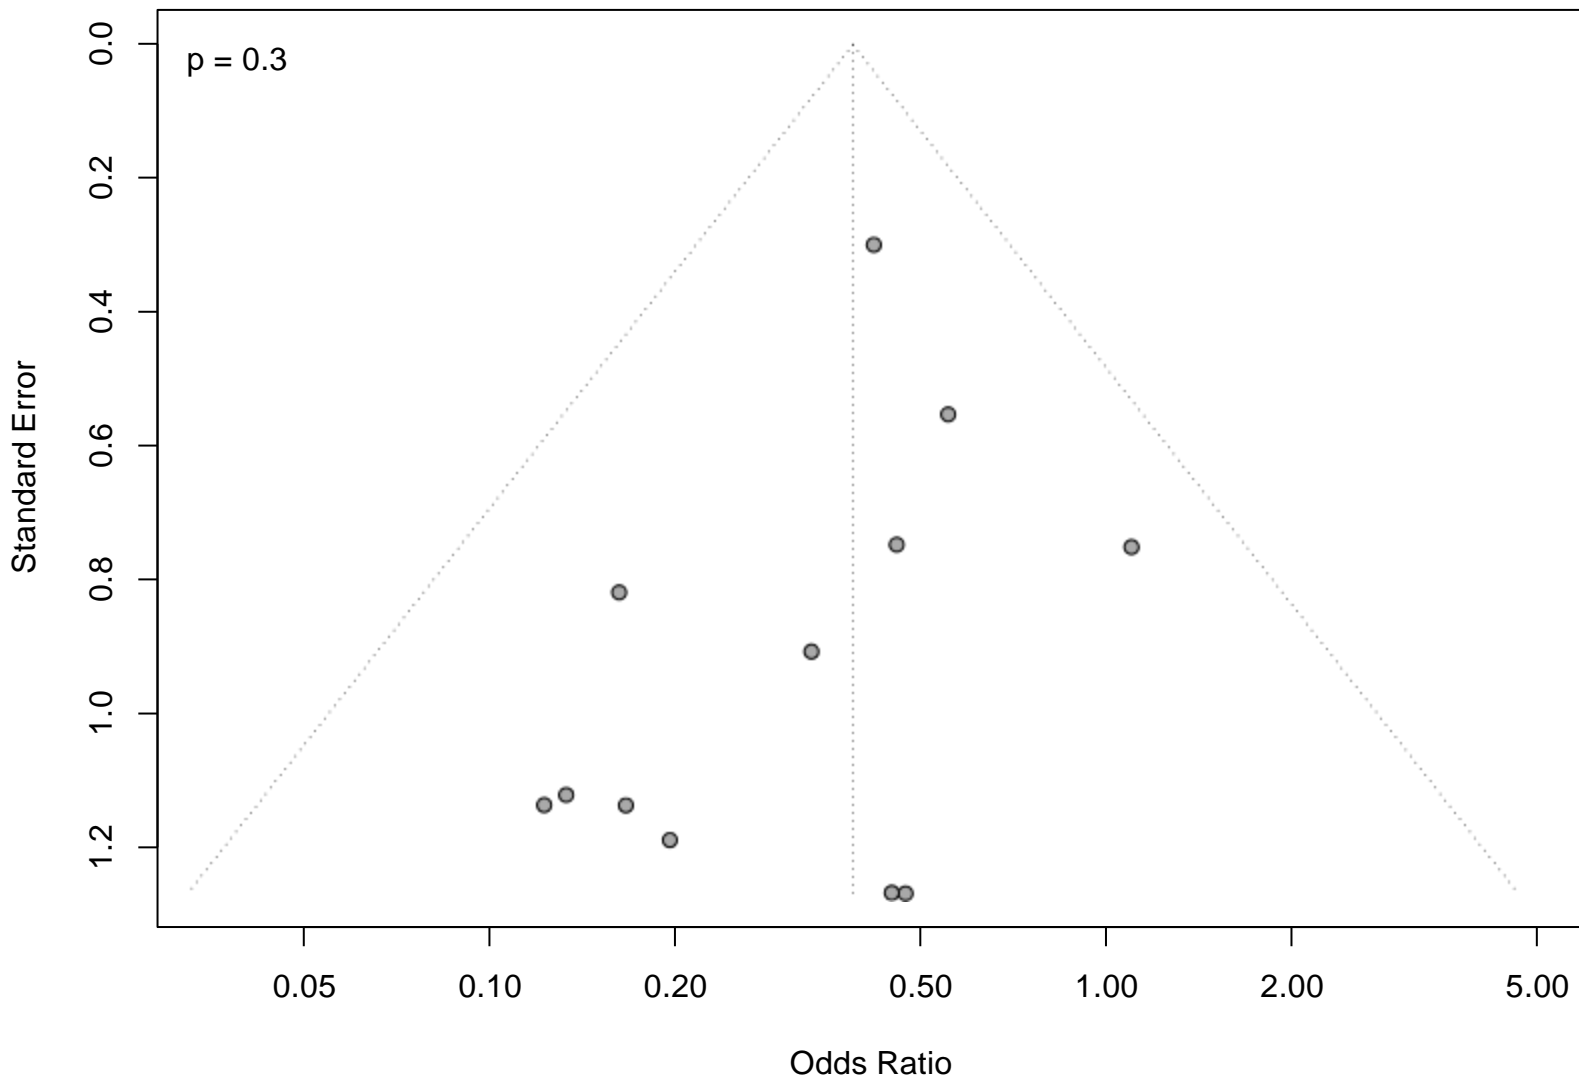

Funnel plot for Supplementary File 7 - Incidence of G  $\geq$ 2 haematologic toxicity

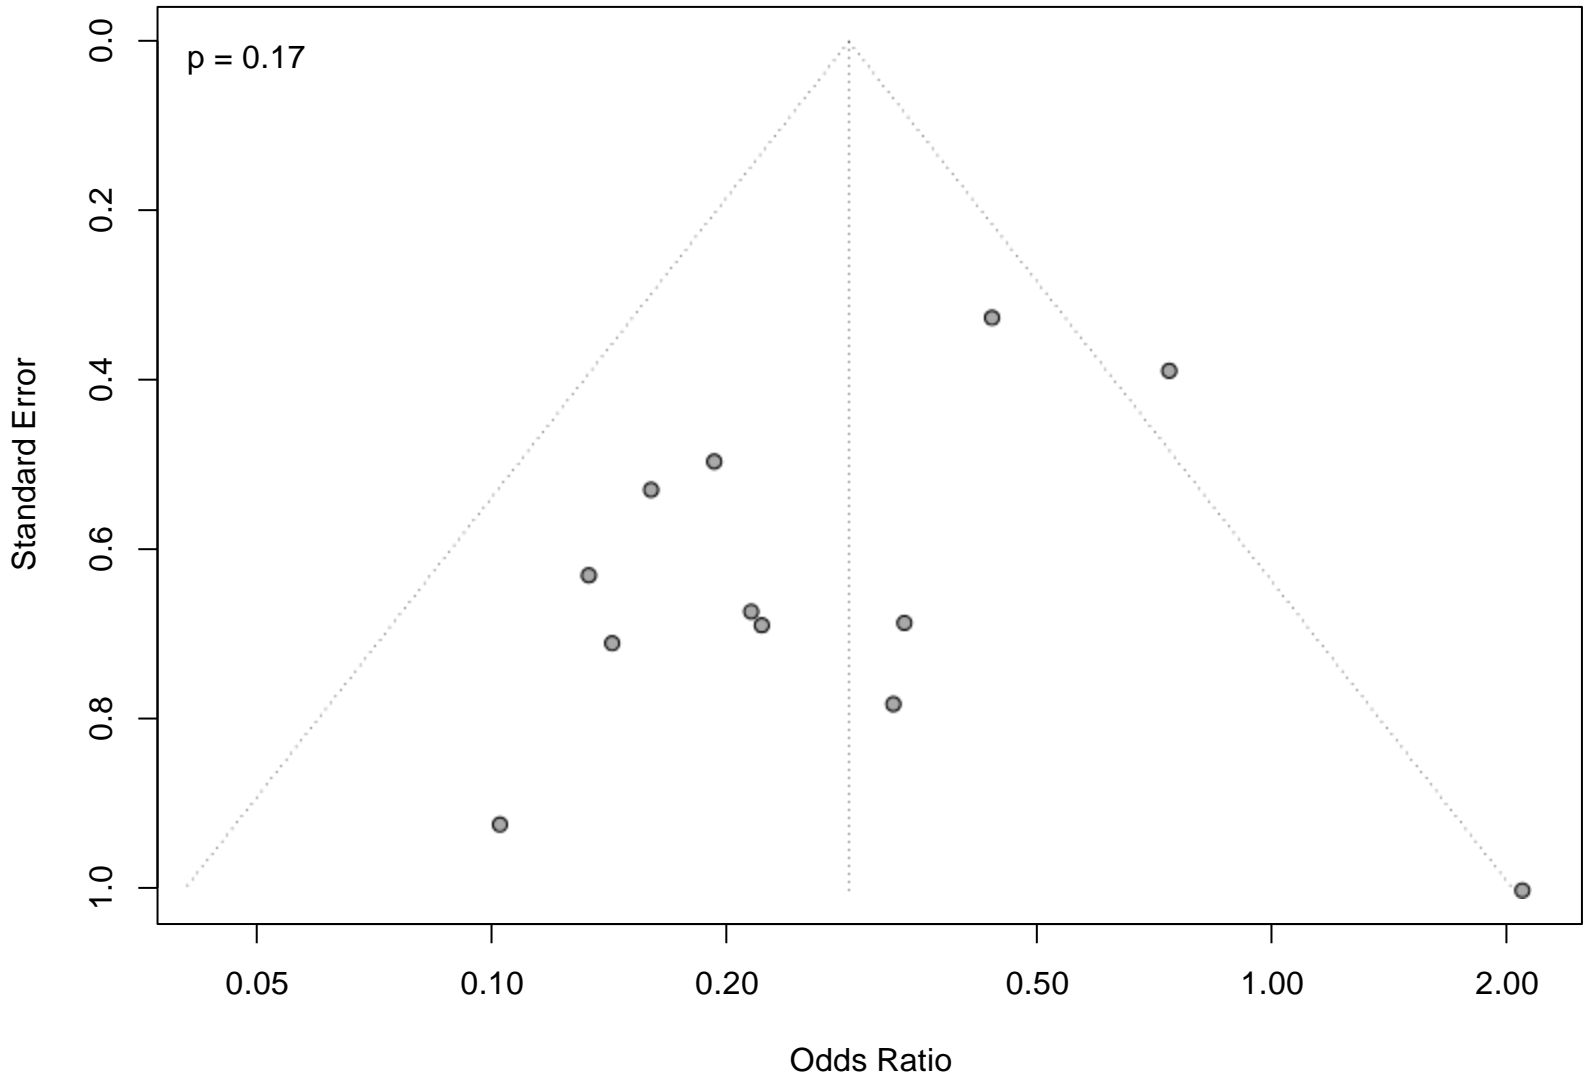

Funnel plot for Figure 3 - Incidence of chemotherapy interruption

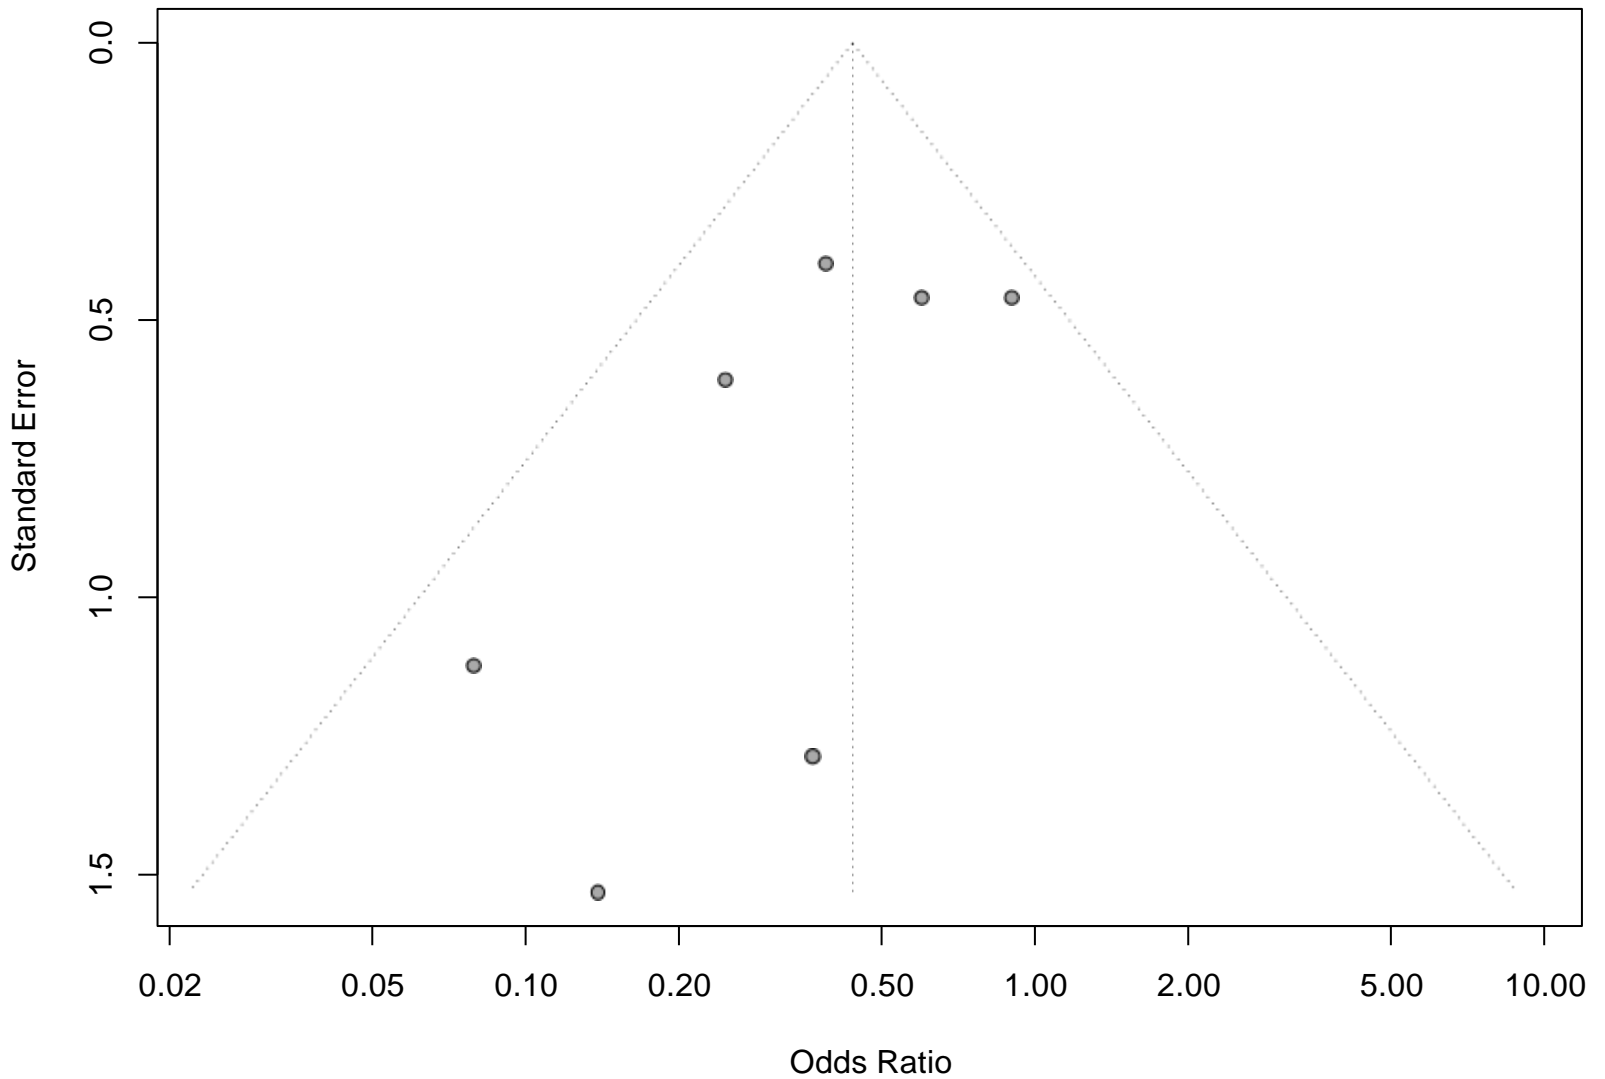

Funnel plot for Supplementary File 9 - Incidence of  $G \geq 2$  gastrointestinal toxicity

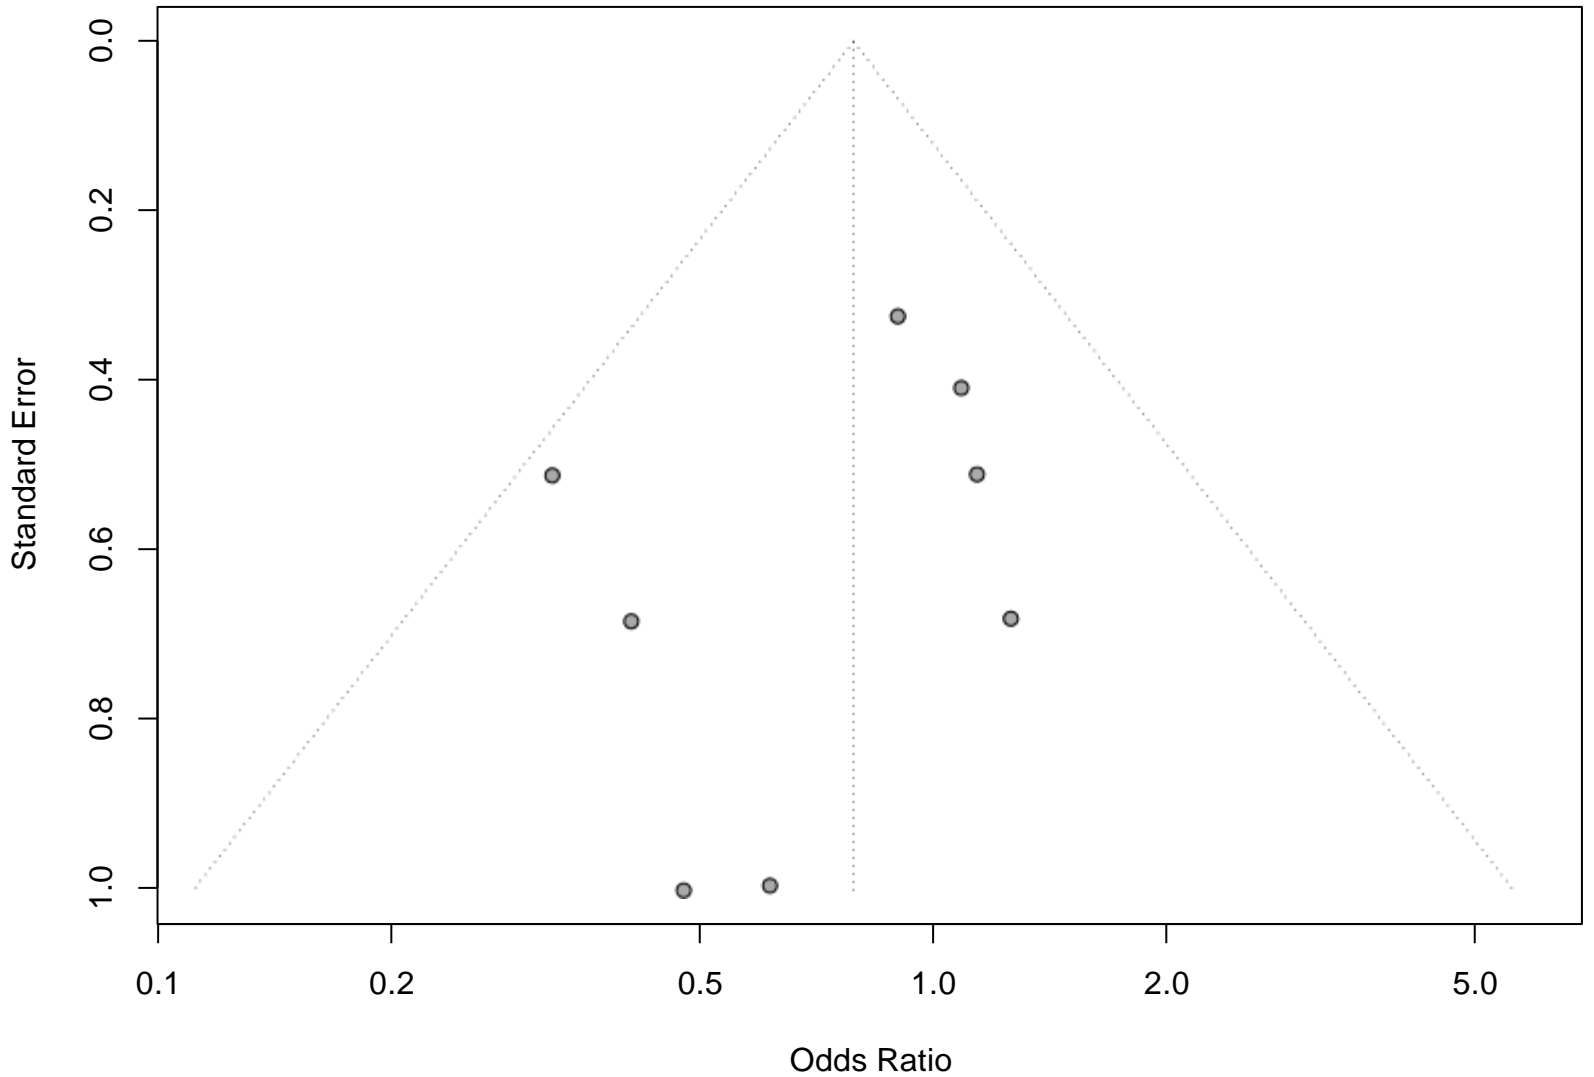

Funnel plot for Supplementary File 9 - Incidence of  $G \geq 3$  gastrointestinal toxicity

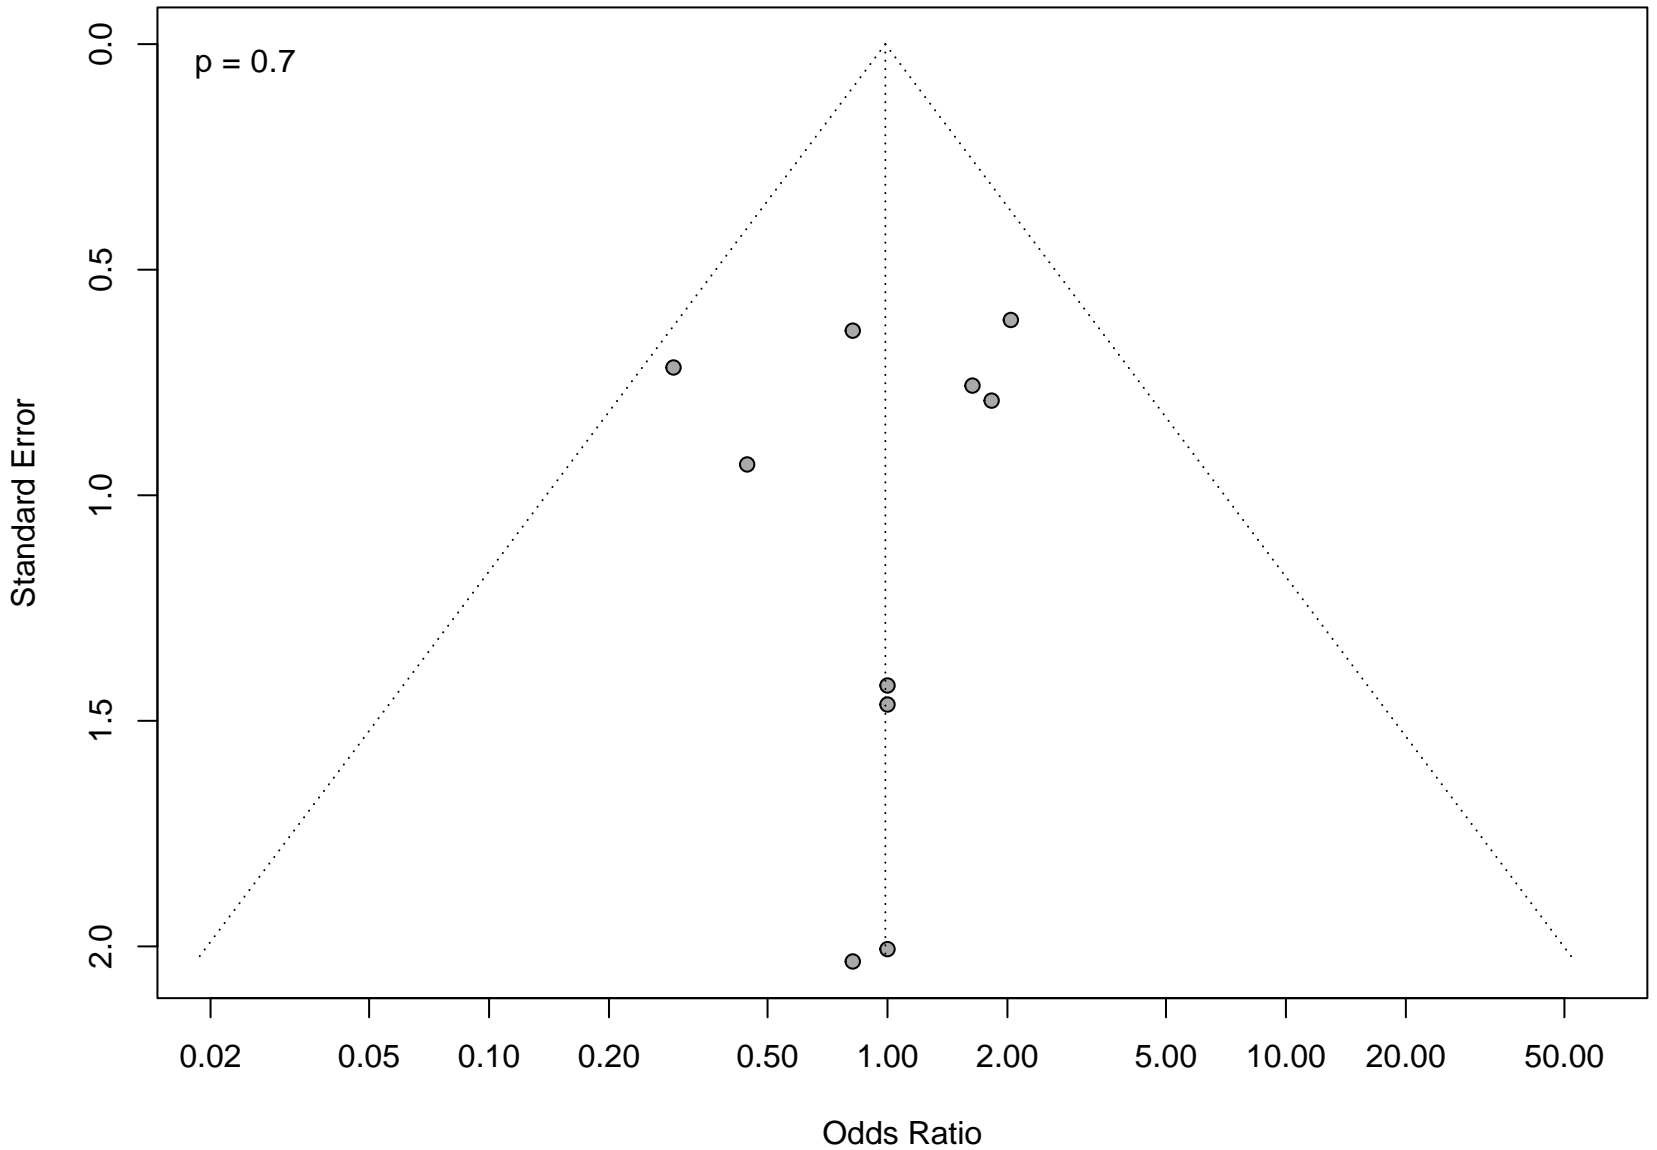

Funnel plot for Supplementary File 9 - Incidence of  $G \geq 2$  genitourinary toxicity

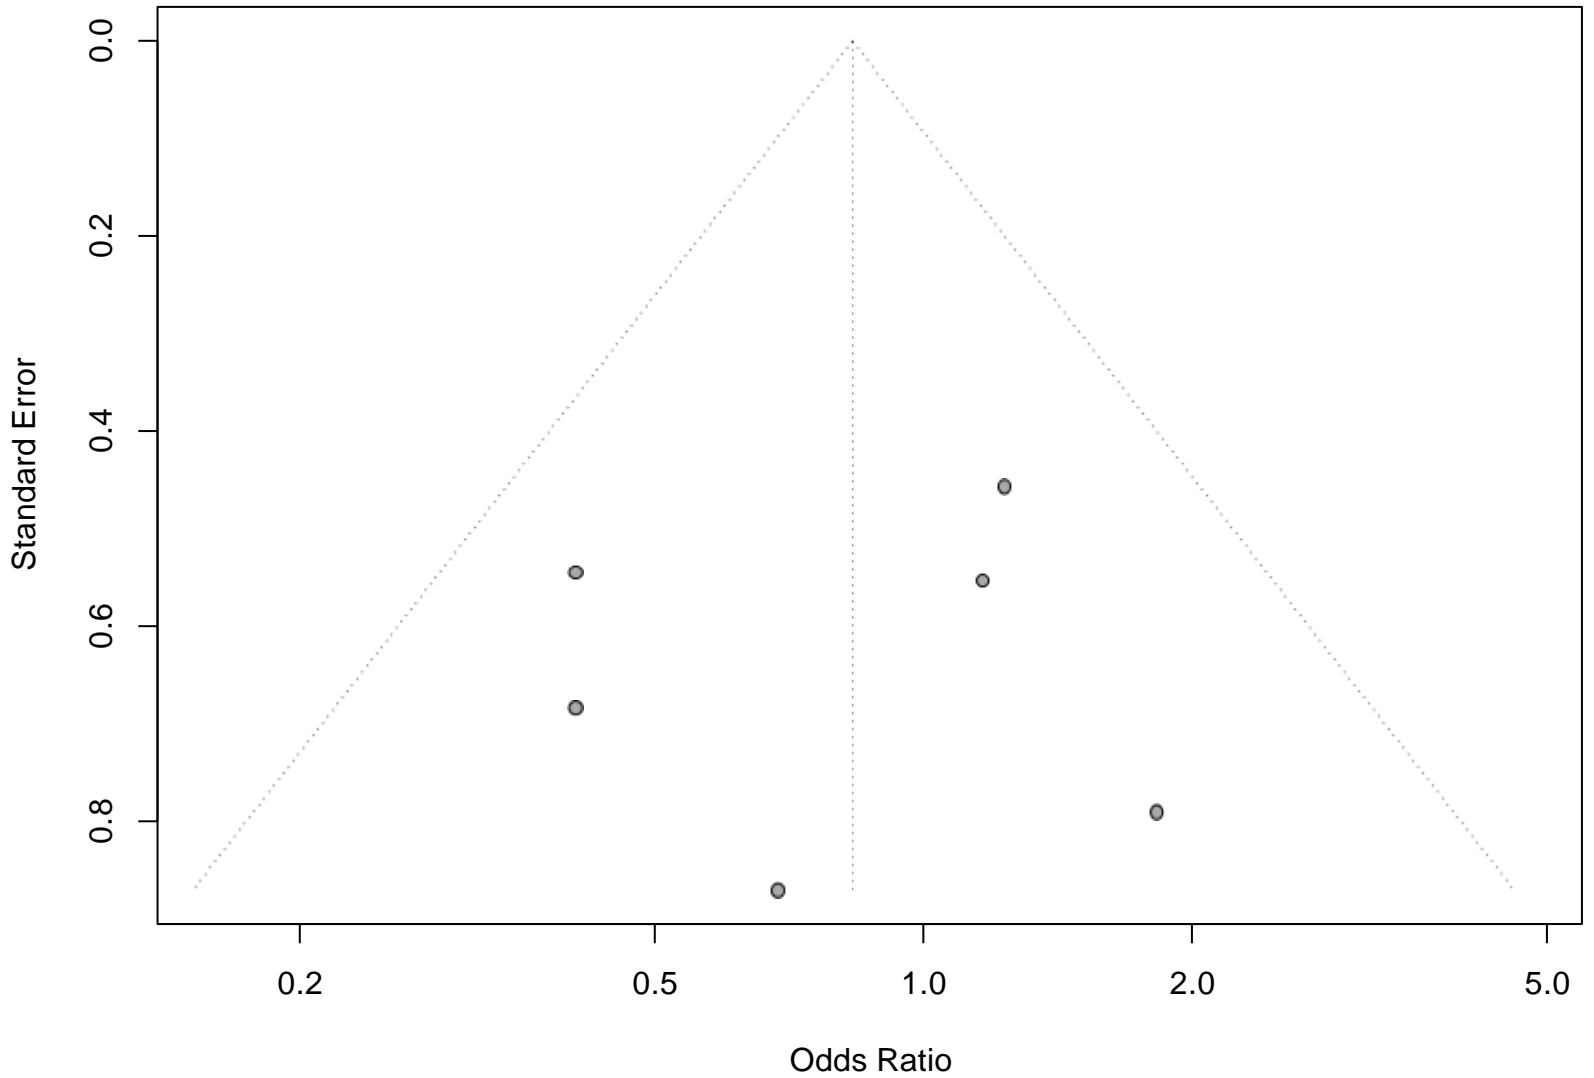

Funnel plot for Supplementary File 9 - Incidence of G  $\geq$ 3 genitourinary toxicity

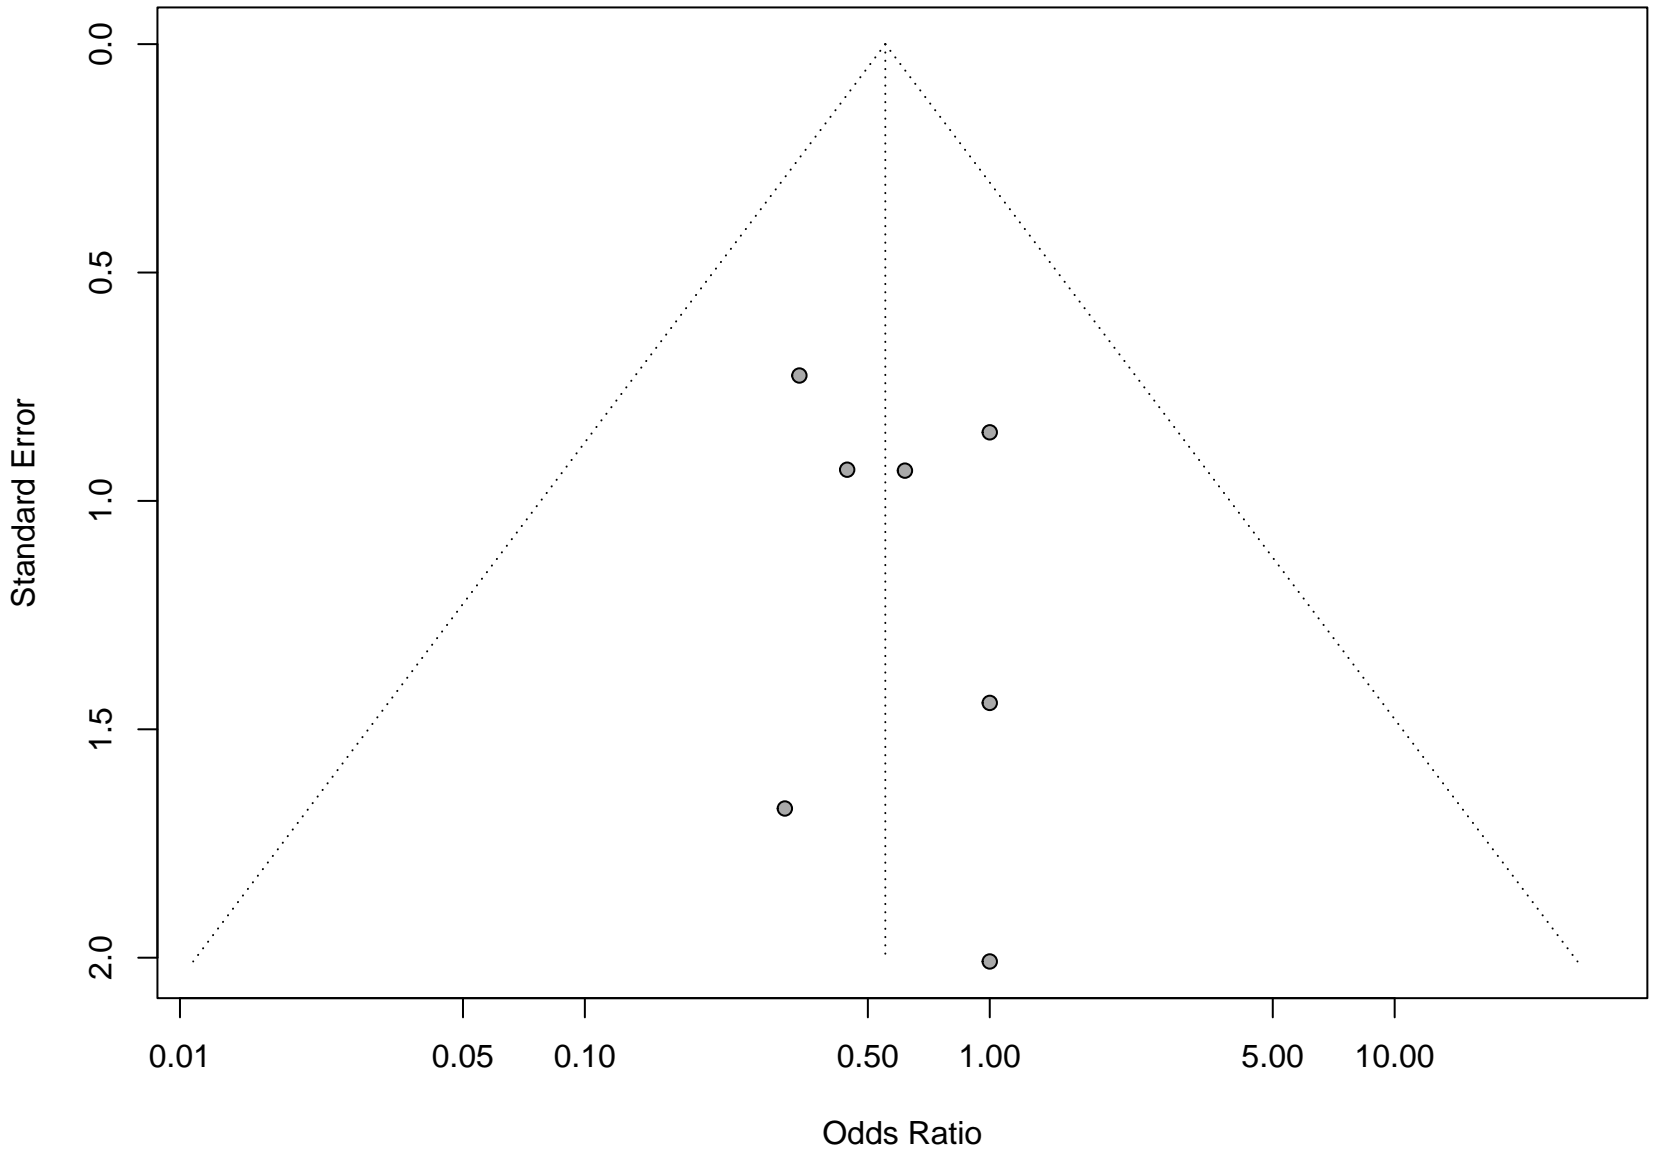

Supplement: mmc11.pdf [file mmc11.pdf]
