# Supplementary material for: Clinical outcomes of pelvic bone marrow sparing radiotherapy for cervical cancer: A systematic review and meta-analysis of randomised controlled trials
Source: PubMed Central journal article supplement — Clin Transl Radiat Oncol. 2024 May 31;47:100801. doi: 10.1016/j.ctro.2024.100801 (PMC11214291; doi:10.1016/j.ctro.2024.100801), 2024-05-31

# Meta-regression analysis for G 3 or higher haematologic toxicity

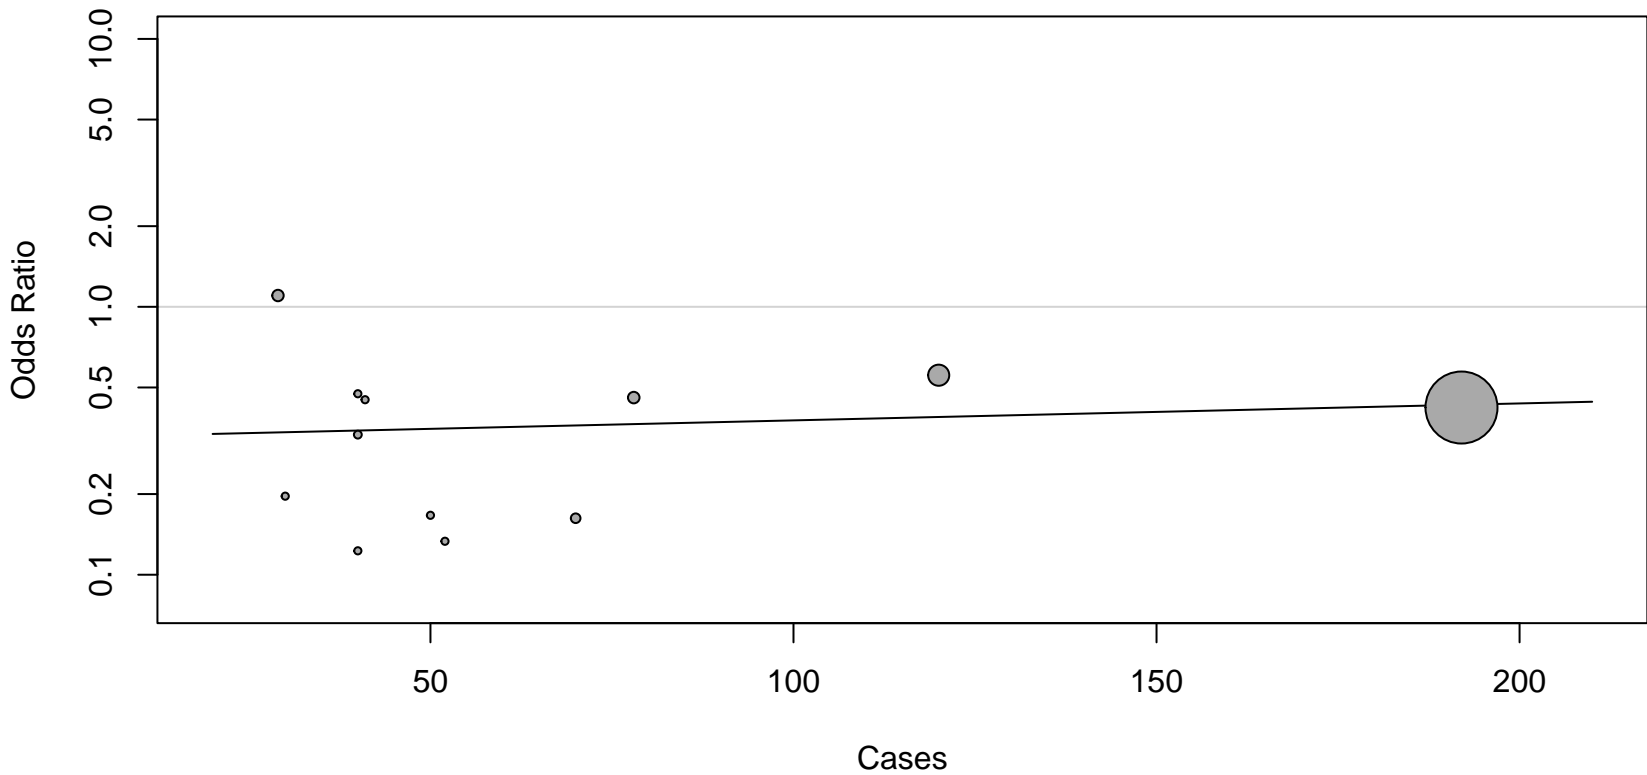

# Meta-regression analysis for chemotherapy interruptions

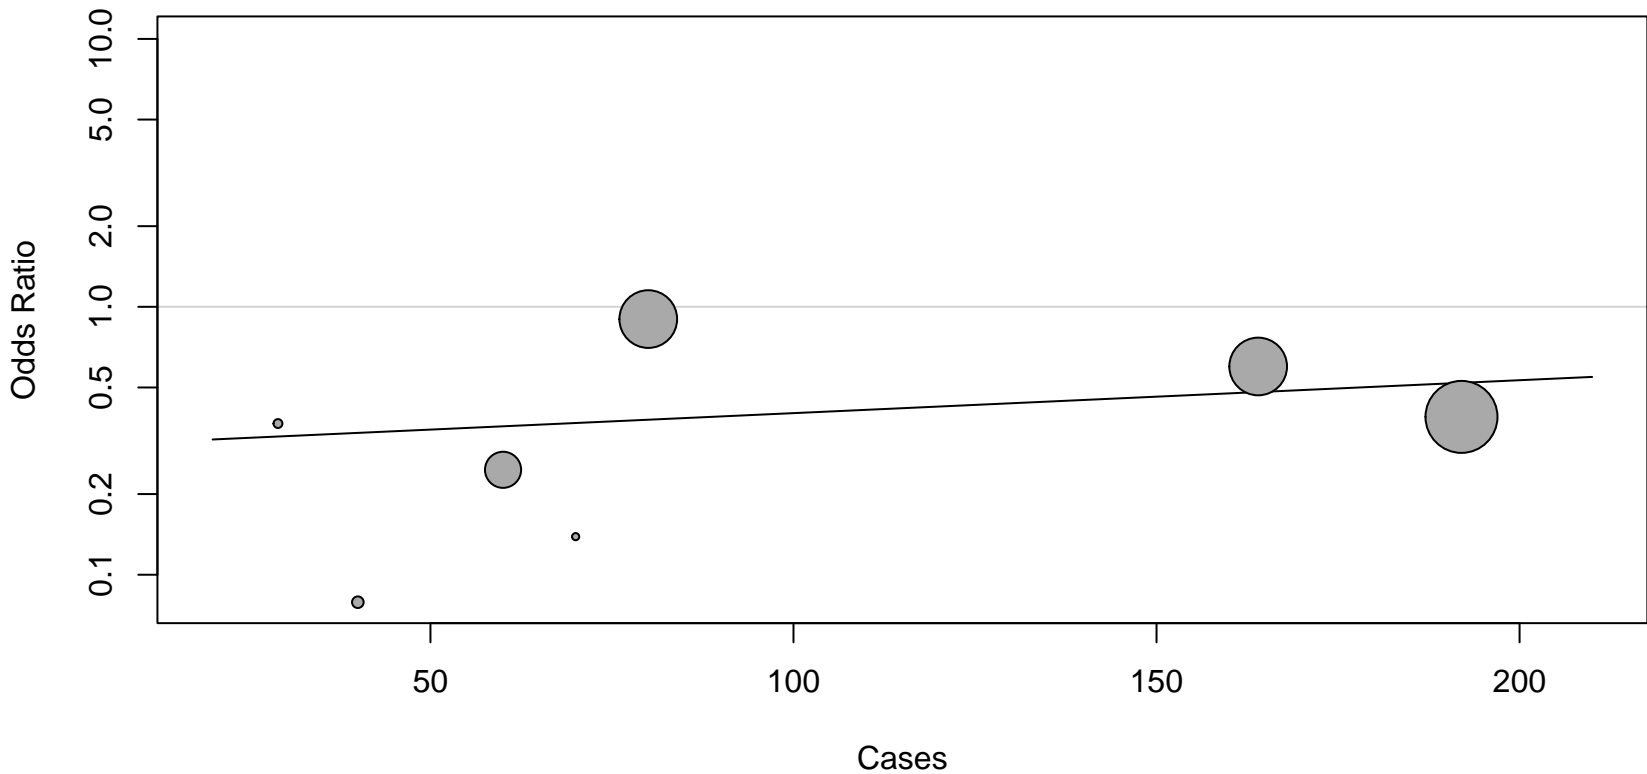

Supplement: mmc12.pdf [file mmc12.pdf]
